# Supplementary material for: Non-Enzymatic Oligomerization of 3’, 5’ Cyclic AMP
Source: PubMed Central journal article supplement (PMC5089550; doi:10.1371/journal.pone.0165723), 2016-11-01
Supplement: pone.0165723.s002.pdf [file pone.0165723.s002.pdf]

*SI #1: Preparation of the 3', 5'-cAMP, H<sup>+</sup>-form*

The process by the manufacturer BioLog consisted in the following: 735  $\mu\text{mol}$  cAMP, Na<sup>+</sup> (BioLog LSI Catalog No. B 004), MW 367.2 g/mol was dissolved in 490 mL deionized H<sub>2</sub>O (1.5 mM) and applied to a cation exchange column pre-equilibrated to the H<sup>+</sup>-form (5 L 0.5 M HCl followed by 10 L H<sub>2</sub>O until neutral) at a flow rate of 5 mL/min. The strong cation exchanger Toyopearl SP-650M (TOSOH Bioscience, Stuttgart, Germany) (binding capacity: 0.15 meq / mL corresponding to a total of 73500 meq) was used. This translated to a 100-fold excess of hydrogen over sodium, if 735  $\mu\text{mol}$  cAMP, Na<sup>+</sup> was applied to the cation exchanger. All product fractions with a concentration higher than 1 mM cAMP, H<sup>+</sup> were pooled and stored at +4°C. The column was regenerated with 5 L 0.5 M HCl and washed with 10 L H<sub>2</sub>O to remove all residual Na<sup>+</sup> ions. Afterwards, the cAMP, H<sup>+</sup> was applied again to the column to remove all remaining traces of Na<sup>+</sup> ions. The resulting product fractions were pooled and filtered through a 0.2  $\mu\text{m}$  membrane. The concentration was adjusted to 1 mM cAMP, H<sup>+</sup> with deionized H<sub>2</sub>O and the solution was frozen at -26°C.
