# Supplementary material for: Non-Enzymatic Oligomerization of 3’, 5’ Cyclic AMP
Source: PubMed Central journal article supplement (PMC5089550; doi:10.1371/journal.pone.0165723), 2016-11-01
Supplement: pone.0165723.s003.pdf [file pone.0165723.s003.pdf]

*SI #2 5' terminal phosphorylation of RNA oligomers*

The standard procedure involves phosphorylation by kinase and [ $\gamma$ - $^{32}\text{P}$ ] ATP. Phosphorylation was carried out by adding 1  $\mu\text{L}$  of T4 Polynucleotide kinase PNK (EC 2.7.1.78, 10 U/ $\mu\text{L}$ , New England Biolabs) (Ipswich, MA, USA; # M0201L), 2  $\mu\text{L}$  of 10  $\times$  PNK buffer and 0.5  $\mu\text{L}$  [ $\gamma$ - $^{32}\text{P}$ ]ATP to the neo-polymerized RNA in 20 $\mu\text{L}$ , followed by incubation at 37  $^{\circ}\text{C}$  for 30 min. This enzyme catalyzes the transfer and exchange of  $\text{P}_i$  from the  $\gamma$ -position of ATP to the 5'-OH terminus of polynucleotides, and the removal of 3'-phosphoryl group from 3'-phosphoryl polynucleotides. One unit is defined as the amount of enzyme catalyzing the production of 1 nmol of phosphate to the 5'-OH end of an oligonucleotide from [ $\gamma$ - $^{32}\text{P}$ ] ATP in 30 min at 37  $^{\circ}\text{C}$ . This procedure typically provides a specific activity of 15000 cpm/pmol.
